# Supplementary material
Source: PubMed Central journal article supplement (PMC2909752)
Supplement: NIHMS191760-supplement-02.pdf [file NIHMS191760-supplement-02.pdf]

| Condition      | Sentence                                                       |
|----------------|----------------------------------------------------------------|
| ObjectCenter   | The waitress [who the lawyer is smiling at _] is Dianna        |
| Subject Right  | Dianna is The waitress [who _ is smiling at the lawyer]        |
| Object Right   | Dianna is The waitress [who the lawyer is smiling at _]        |
| Subject Center | The waitress who _ is smiling at the lawyer is Dianna          |
| ObjectCenter   | The cowboy [who the sheriff is bickering at _] is Ian          |
| Subject Right  | Ian is The cowboy [who _ is bickering at the sheriff]          |
| Object Right   | Ian is The cowboy [who the sheriff is bickering at _]          |
| Subject Center | The cowboy [who _ is bickering at the sheriff] is Ian          |
| ObjectCenter   | The senator [who the mayor is attacking _] is Michael          |
| Subject Right  | Michael is The senator [who _ is attacking the mayor]          |
| Object Right   | Michael is The senator [who the mayor is attacking _]          |
| Subject Center | The senator [who _ is attacking the mayor] is Michael          |
| ObjectCenter   | The prisoner [who the policeman is kicking _] is Ryan          |
| Subject Right  | Ryan is The prisoner [who _ is kicking the policeman]          |
| Object Right   | Ryan is The prisoner [who the policeman is kicking _]          |
| Subject Center | The prisoner [who _ is kicking the policeman] is Ryan          |
| ObjectCenter   | The patient [who the doctor is responding to _] is Kristen     |
| Subject Right  | Kristen is The patient [who _ is responding to the doctor]     |
| Object Right   | Kristen is The patient [who the doctor is responding to _]     |
| Subject Center | The patient [who _ is responding to the doctor] is Kristen     |
| ObjectCenter   | The reporter [who the actress is kissing _] is Steven          |
| Subject Right  | Steven is The reporter [who _ is kissing the actress]          |
| Object Right   | Steven is The reporter [who the actress is kissing _]          |
| Subject Center | The reporter [who _ is kissing the actress] is Steven          |
| ObjectCenter   | The customer [who the butcher is listening to _] is John       |
| Subject Right  | John is The customer [who _ is listening to the butcher]       |
| Object Right   | John is The customer [who the butcher is listening to _]       |
| Subject Center | The customer [who _ is listening to the butcher] is John       |
| ObjectCenter   | The wrestler [who the gymnast is laughing at _] is Christopher |
| Subject Right  | Christopher is The wrestler [who _ is laughing at the gymnast] |
| Object Right   | Christopher is The wrestler [who the gymnast is laughing at _] |
| Subject Center | The wrestler [who _ is laughing at the gymnast] is Christopher |
| ObjectCenter   | The engineer [who the contractor is patting _] is David        |
| Subject Right  | David is The engineer [who _ is patting the contractor]        |
| Object Right   | David is The engineer [who the contractor is patting _]        |
| Subject Center | The engineer [who _ is patting the contractor] is David        |
| ObjectCenter   | The teenager [who the nanny is tickling _] is Emily            |
| Subject Right  | Emily is The teenager [who _ is tickling the nanny]            |
| Object Right   | Emily is The teenager [who the nanny is tickling _]            |
| Subject Center | The teenager [who _ is tickling the nanny] is Emily            |
| ObjectCenter   | The singer [who the pianist is hugging _] is Julie             |
| Subject Right  | Julie is The singer [who _ is hugging the pianist]             |
| Object Right   | Julie is The singer [who the pianist is hugging _]             |
| Subject Center | The singer [who _ is hugging the pianist] is Julie             |
| ObjectCenter   | The student [who the teacher is staring at _] is Christina     |
| Subject Right  | Christina is The student [who _ is staring at the teacher]     |
| Object Right   | Christina is The student [who the teacher is staring at _]     |
| Subject Center | The student [who _ is staring at the teacher] is Christina     |
| ObjectCenter   | The model [who the actor is gossiping to _] is Sophie          |
| Subject Right  | Sophie is The model [who _ is gossiping to the actor]          |
| Object Right   | Sophie is The model [who the actor is gossiping to _]          |
| Subject Center | The model [who _ is gossiping to the actor] is Sophie          |
| ObjectCenter   | The farmer [who the baker is yelling at _] is Jeremy           |
| Subject Right  | Jeremy is The farmer [who _ is yelling at the baker]           |
| Object Right   | Jeremy is The farmer [who the baker is yelling at _]           |
| Subject Center | The farmer [who _ is yelling at the baker] is Jeremy           |
| ObjectCenter   | The swimmer [who the lifeguard is angry at _] is Miranda       |
| Subject Right  | Miranda is The swimmer [who _ is angry at the lifeguard]       |
| Object Right   | Miranda is The swimmer [who the lifeguard is angry at _]       |
| Subject Center | The swimmer [who _ is angry at the lifeguard] is Miranda       |
| ObjectCenter   | The cheerleader [who the mascot is pinching _] is Meredith     |
| Subject Right  | Meredith is The cheerleader [who _ is pinching the mascot]     |
| Object Right   | Meredith is The cheerleader [who the mascot is pinching _]     |
| Subject Center | The cheerleader [who _ is pinching the mascot] is Meredith     |
| ObjectCenter   | The writer [who the publisher is avoiding _] is Peter          |
| Subject Right  | Peter is The writer [who _ is avoiding the publisher]          |
| Object Right   | Peter is The writer [who the publisher is avoiding _]          |
| Subject Center | The writer [who _ is avoiding the publisher] is Peter          |
| ObjectCenter   | The housewife [who the pharmacist is grinning at _] is Cindy   |
| Subject Right  | Cindy is The housewife [who _ is grinning at the pharmacist]   |
| Object Right   | Cindy is The housewife [who the pharmacist is grinning at _]   |
| Subject Center | The housewife [who _ is grinning at the pharmacist] is Cindy   |
| ObjectCenter   | The stewardess [who the pilot is talking to _] is Lisa         |
| Subject Right  | Lisa is The the stewardess [who _ is talking to the pilot]     |
| Object Right   | Lisa is The the stewardess [who the pilot is talking to _]     |
| Subject Center | The the stewardess [who _ is talking to the pilot] is Lisa     |
| ObjectCenter   | The gambler [who the officer is slapping _] is Frederick       |
| Subject Right  | Frederick is The gambler [who _ is slapping the officer]       |
| Object Right   | Frederick is The gambler [who the officer is slapping _]       |
| Subject Center | The gambler [who _ is slapping the officer] is Frederick       |
| ObjectCenter   | The researcher [who the secretary is teasing _] is Beth        |

|                |                                                                |
|----------------|----------------------------------------------------------------|
| Subject Right  | Beth is The researcher [who _ is teasing the secretary]        |
| Object Right   | Beth is The researcher [who the secretary is teasing _]        |
| Subject Center | The researcher [who _ is teasing the secretary] is Beth        |
| ObjectCenter   | The witness [who the detective is glaring at _] is Leah        |
| Subject Right  | Leah is The witness [who _ is glaring at the detective]        |
| Object Right   | Leah is The witness [who the detective is glaring at _]        |
| Subject Center | The witness [who _ is glaring at the detective] is Leah        |
| ObjectCenter   | The fireman [who the governor is writing to _] is Jerry        |
| Subject Right  | Jerry is The fireman [who _ is writing to the governor]        |
| Object Right   | Jerry is The fireman [who the governor is writing to _]        |
| Subject Center | The fireman [who _ is writing to the governor] is Jerry        |
| ObjectCenter   | The juror [who the attorney is grimacing at _] is Jen          |
| Subject Right  | Jen is The juror [who _ is grimacing at the attorney]          |
| Object Right   | Jen is The juror [who the attorney is grimacing at _]          |
| Subject Center | The juror [who _ is grimacing at the attorney] is Jen          |
| ObjectCenter   | The apprentice [who the carpenter is eyeing _] is Derek        |
| Subject Right  | Derek is The apprentice [who _ is eyeing the carpenter]        |
| Object Right   | Derek is The apprentice [who the carpenter is eyeing _]        |
| Subject Center | The apprentice [who _ is eyeing the carpenter] is Derek        |
| ObjectCenter   | The scientist [who the editor is praising _] is Patrick        |
| Subject Right  | Patrick is The scientist [who _ is praising the editor]        |
| Object Right   | Patrick is The scientist [who the editor is praising _]        |
| Subject Center | The scientist [who _ is praising the editor] is Patrick        |
| ObjectCenter   | The soldier [who the general is insulting _] is William        |
| Subject Right  | William is The soldier [who _ is insulting the general]        |
| Object Right   | William is The soldier [who the general is insulting _]        |
| Subject Center | The soldier [who _ is insulting the general] is William        |
| ObjectCenter   | The painter [who the architect is admiring _] is Charlie       |
| Subject Right  | Charlie is The painter [who _ is admiring the architect]       |
| Object Right   | Charlie is The painter [who the architect is admiring _]       |
| Subject Center | The painter [who _ is admiring the architect] is Charlie       |
| ObjectCenter   | The tourist [who the president is chasing _] is Angela         |
| Subject Right  | Angela is The tourist [who _ is chasing the president]         |
| Object Right   | Angela is The tourist [who the president is chasing _]         |
| Subject Center | The tourist [who _ is chasing the president] is Angela         |
| ObjectCenter   | The linesman [who the quarterback is cursing at _] is Andrew   |
| Subject Right  | Andrew is The linesman [who _ is cursing at the quarterback]   |
| Object Right   | Andrew is The linesman [who the quarterback is cursing at _]   |
| Subject Center | The linesman [who _ is cursing at the quarterback] is Andrew   |
| ObjectCenter   | The widow [who the mortician is calling _] is Sabrina          |
| Subject Right  | Sabrina is The widow [who _ is calling the mortician]          |
| Object Right   | Sabrina is The widow [who the mortician is calling _]          |
| Subject Center | The widow [who _ is calling the mortician] is Sabrina          |
| ObjectCenter   | The therapist [who the client is speaking to _] is Emma        |
| Subject Right  | Emma is The therapist [who _ is speaking to the client]        |
| Object Right   | Emma is The therapist [who the client is speaking to _]        |
| Subject Center | The therapist [who _ is speaking to the client] is Emma        |
| ObjectCenter   | The salesman [who the bartender is pointing to _] is Jacob     |
| Subject Right  | Jacob is The salesman [who _ is pointing to the bartender]     |
| Object Right   | Jacob is The salesman [who the bartender is pointing to _]     |
| Subject Center | The salesman [who _ is pointing to the bartender] is Jacob     |
| ObjectCenter   | The mailman [who the banker is waving to _] is Larry           |
| Subject Right  | Larry is The mailman [who _ is waving to the banker]           |
| Object Right   | Larry is The mailman [who the banker is waving to _]           |
| Subject Center | The mailman [who _ is waving to the banker] is Larry           |
| ObjectCenter   | The surfer [who the dancer is cooking for _] is Anthony        |
| Subject Right  | Anthony is The surfer [who _ is cooking for the dancer]        |
| Object Right   | Anthony is The surfer [who the dancer is cooking for _]        |
| Subject Center | The surfer [who _ is cooking for the dancer] is Anthony        |
| ObjectCenter   | The instructor [who the principle is correcting _] is Luke     |
| Subject Right  | Luke is The instructor [who _ is correcting the principle]     |
| Object Right   | Luke is The instructor [who the principle is correcting _]     |
| Subject Center | The instructor [who _ is correcting the principle] is Luke     |
| ObjectCenter   | The hairdresser [who the florist is running to _] is Linda     |
| Subject Right  | Linda is The hairdresser [who _ is running to the florist]     |
| Object Right   | Linda is The hairdresser [who the florist is running to _]     |
| Subject Center | The hairdresser [who _ is running to the florist] is Linda     |
| ObjectCenter   | The cashier [who the councilman is flattering _] is Jacquie    |
| Subject Right  | Jacquie is The cashier [who _ is flattering the councilman]    |
| Object Right   | Jacquie is The cashier [who the councilman is flattering _]    |
| Subject Center | The cashier [who _ is flattering the councilman] is Jacquie    |
| ObjectCenter   | The translator [who the newscaster is searching for _] is Anne |
| Subject Right  | Anne is The translator [who _ is searching for the newscaster] |
| Object Right   | Anne is The translator [who the newscaster is searching for _] |
| Subject Center | The translator [who _ is searching for the newscaster] is Anne |
| ObjectCenter   | The fisherman [who the sailor is greeting _] is Gregory        |
| Subject Right  | Gregory is The fisherman [who _ is greeting the sailor]        |
| Object Right   | Gregory is The fisherman [who the sailor is greeting _]        |
| Subject Center | The fisherman [who _ is greeting the sailor] is Gregory        |
| ObjectCenter   | The nurse [who the manager is whispering to _] is Sherry       |
| Subject Right  | Sherry is The nurse [who _ is whispering to the manager]       |
| Object Right   | Sherry is The nurse [who the manager is whispering to _]       |

|                       |                                                             |
|-----------------------|-------------------------------------------------------------|
| <b>Subject Center</b> | The nurse [who _ is whispering to the manager] is Sherry    |
| <b>ObjectCenter</b>   | The youngster [who the babysitter is holding _] is Mary     |
| <b>Subject Right</b>  | Mary is The youngster [who _ is holding the babysitter]     |
| <b>Object Right</b>   | Mary is The youngster [who the babysitter is holding _]     |
| <b>Subject Center</b> | The youngster [who _ is holding the babysitter] is Mary     |
| <b>ObjectCenter</b>   | The cyclist [who the coach is screaming at _] is Penelope   |
| <b>Subject Right</b>  | Penelope is The cyclist [who _ is screaming at the coach]   |
| <b>Object Right</b>   | Penelope is The cyclist [who the coach is screaming at _]   |
| <b>Subject Center</b> | The cyclist [who _ is screaming at the coach] is Penelope   |
| <b>ObjectCenter</b>   | The physicist [who the chemist is undermining _] is Dave    |
| <b>Subject Right</b>  | Dave is The physicist [who _ is undermining the chemist]    |
| <b>Object Right</b>   | Dave is The physicist [who the chemist is undermining _]    |
| <b>Subject Center</b> | The physicist [who _ is undermining the chemist] is Dave    |
| <b>ObjectCenter</b>   | The bodyguard [who the gangster is shoving _] is Zachary    |
| <b>Subject Right</b>  | Zachary is The bodyguard [who _ is shoving the gangster]    |
| <b>Object Right</b>   | Zachary is The bodyguard [who the gangster is shoving _]    |
| <b>Subject Center</b> | The bodyguard [who _ is shoving the gangster] is Zachary    |
| <b>ObjectCenter</b>   | The grandmother [who the child is pulling _] is Veronica    |
| <b>Subject Right</b>  | Veronica is The grandmother [who _ is pulling the child]    |
| <b>Object Right</b>   | Veronica is The grandmother [who the child is pulling _]    |
| <b>Subject Center</b> | The grandmother [who _ is pulling the child] is Veronica    |
| <b>ObjectCenter</b>   | The technician [who the surgeon is questioning _] is Joseph |
| <b>Subject Right</b>  | Joseph is The technician [who _ is questioning the surgeon] |
| <b>Object Right</b>   | Joseph is The technician [who the surgeon is questioning _] |
| <b>Subject Center</b> | The technician [who _ is questioning the surgeon] is Joseph |
| <b>ObjectCenter</b>   | The guitarist [who the songwriter is humming to _] is Paul  |
| <b>Subject Right</b>  | Paul is The guitarist [who _ is humming to the songwriter]  |
| <b>Object Right</b>   | Paul is The guitarist [who the songwriter is humming to _]  |
| <b>Subject Center</b> | The guitarist [who _ is humming to the songwriter] is Paul  |
