# Supplementary material
Source: PubMed Central journal article supplement (PMC2909752)
Supplement: NIHMS191760-supplement-5.pdf [file NIHMS191760-supplement-5.pdf]

## Supplementary Figure Captions

### Figure 1.

Presents tree diagrams for the two right right-branching sentences. (a.) contains an object-relative and (b.) contains a subject relative.

### Figure 2.

Presents tree diagrams for the two center-embedded sentences. (a.) contains an object-relative and (b.) contains a subject relative.
